# Supplementary material for: The water-dipping effect of branched poly(ethylene imine) interfacial layers on the performance and stability of polymer:nonfullerene solar cells
Source: Royal Society of Chemistry journal article supplement (doi:10.1039/d3se00831b), 2023-01-01
Supplement: d3se00831b1.pdf [file d3se00831b1.pdf]

## Supporting Information

### **Water-dipping Effect of Branched Poly(ethylene imine) Interfacial Layers on the Performance and Stability of Polymer:Nonfullerene Solar Cells**

**Hyunji Son<sup>1,2,+</sup>, Woongki Lee<sup>1,+</sup>, Sooyong Lee<sup>1</sup>, Hwajeong Kim<sup>1,3,\*</sup>, Youngkyoo Kim<sup>1,2,\*</sup>**

<sup>1</sup> Organic Nanoelectronics Laboratory and KNU Institute for Nanophotonics Applications (KINPA), Department of Chemical Engineering, Kyungpook National University, Daegu 41566, Republic of Korea

<sup>2</sup> Department of Hydrogen & Renewable Energy, Kyungpook National University, Daegu 41566, Republic of Korea

<sup>3</sup> Priority Research Center, Research Institute of Environmental Science & Technology, Kyungpook National University, Daegu 41566, Republic of Korea

<sup>+</sup>Equal Contribution

<sup>\*</sup>Correspondence: Prof. Y. Kim, Dr. H. Kim

Email) ykimm@knu.ac.kr, khj217@knu.ac.kr

Tel) +82-(0)53-950-5616

**Table S1.** Extended summary of solar cell parameters (averaged values from more than 10 devices) for the inverted-type PM6:Y11 solar cells with the bPEI layers according to the bPEI thickness. Note that the minimum and maximum values are given in the bracket just below the average values.

| Parameter                                       | bPEI Thickness (nm)    |                        |                        |                        |                        |                        |                        |                        |                        |
|-------------------------------------------------|------------------------|------------------------|------------------------|------------------------|------------------------|------------------------|------------------------|------------------------|------------------------|
|                                                 | 0                      | 0.1                    | 0.2                    | 0.5                    | 0.7                    | 1.0                    | 1.5                    | 2.0                    | 5.0                    |
| <b>V<sub>oc</sub></b><br>(V)                    | 0.38<br>(0.27~0.45)    | 0.84<br>(0.82~0.85)    | 0.86<br>(0.85~0.87)    | 0.86<br>(0.86~0.87)    | 0.86<br>(0.85~0.86)    | 0.85<br>(0.85~0.86)    | 0.85<br>(0.83~0.86)    | 0.84<br>(0.82~0.85)    | 0.61<br>(0.50~0.76)    |
| <b>J<sub>sc</sub></b><br>(mA cm <sup>-2</sup> ) | 15.99<br>(14.27~17.05) | 19.09<br>(17.79~20.21) | 19.44<br>(18.15~20.26) | 19.84<br>(18.95~20.59) | 19.68<br>(19.15~20.39) | 19.81<br>(18.71~20.39) | 19.00<br>(18.44~19.81) | 13.67<br>(12.59~15.32) | 0.05<br>(0.03~0.09)    |
| <b>FF</b><br>(%)                                | 40.58<br>(34.01~43.95) | 56.73<br>(53.33~59.52) | 60.18<br>(56.93~62.91) | 62.24<br>(59.40~69.23) | 60.11<br>(56.52~61.64) | 56.89<br>(52.44~61.96) | 52.09<br>(48.10~54.72) | 33.22<br>(29.86~36.72) | 19.58<br>(17.15~20.66) |
| <b>PCE</b><br>(%)                               | 2.49<br>(1.49~3.16)    | 9.05<br>(8.49~9.80)    | 10.05<br>(9.30~10.55)  | 10.54<br>(10.00~11.03) | 10.12<br>(9.80~10.41)  | 9.62<br>(8.92~10.02)   | 8.39<br>(7.80~8.76)    | 3.79<br>(3.11~4.42)    | 0.01<br>(0.00~0.01)    |
| <b>R<sub>s</sub></b><br>(kΩ)                    | 0.22<br>(0.17~0.28)    | 0.18<br>(0.13~0.28)    | 0.14<br>(0.10~0.18)    | 0.12<br>(0.10~0.16)    | 0.13<br>(0.12~0.19)    | 0.16<br>(0.10~0.23)    | 0.23<br>(0.18~0.32)    | 2.31<br>(1.08~5.13)    | 699.96<br>(270~1073)   |
| <b>R<sub>sh</sub></b><br>(kΩ)                   | 1.88<br>(0.84~2.48)    | 6.43<br>(4.57~8.03)    | 7.80<br>(6.59~9.17)    | 8.60<br>(7.51~9.63)    | 7.86<br>(7.06~8.94)    | 7.23<br>(5.74~8.68)    | 6.23<br>(4.39~7.71)    | 3.14<br>(2.61~3.54)    | 212.75<br>(75.1~296.5) |

**Table S2.** Extended summary of solar cell parameters (averaged values from more than 10 devices) for the inverted-type PM6:Y11 solar cells with the water-dipped bPEI layers according to the dipping (immersion) time (TDIP) of bPEI layers (initial thickness = 2.0 nm). Note that the minimum and maximum values are given in the bracket just below the average values.

| Parameter                                 | T <sub>DIP</sub> (min) |                        |                        |                        |                        |
|-------------------------------------------|------------------------|------------------------|------------------------|------------------------|------------------------|
|                                           | 0                      | 10                     | 30                     | 60                     | 90                     |
| V <sub>oc</sub><br>(V)                    | 0.84<br>(0.82~0.85)    | 0.87<br>(0.87~0.88)    | 0.88<br>(0.86~0.89)    | 0.88<br>(0.87~0.88)    | 0.88<br>(0.87~0.88)    |
| J <sub>sc</sub><br>(mA cm <sup>-2</sup> ) | 13.67<br>(12.59~15.32) | 20.06<br>(19.49~20.81) | 20.14<br>(19.02~21.62) | 19.92<br>(19.00~20.67) | 19.80<br>(19.05~20.61) |
| FF<br>(%)                                 | 33.22<br>(29.86~36.72) | 52.67<br>(51.26~53.45) | 57.96<br>(53.92~61.73) | 55.66<br>(52.47~58.13) | 54.04<br>(53.06~54.93) |
| PCE<br>(%)                                | 3.79<br>(3.11~4.42)    | 9.22<br>(8.66~9.58)    | 10.25<br>(9.79~10.76)  | 9.70<br>(9.33~10.36)   | 9.39<br>(9.12~9.71)    |
| R <sub>s</sub><br>(kΩ)                    | 2.31<br>(1.08~5.13)    | 0.24<br>(0.22~0.25)    | 0.15<br>(0.12~0.21)    | 0.19<br>(0.15~0.22)    | 0.23<br>(0.20~0.25)    |
| R <sub>SH</sub><br>(kΩ)                   | 3.14<br>(2.61~3.54)    | 5.80<br>(4.23~6.90)    | 8.86<br>(5.82~16.50)   | 8.10<br>(5.28~13.53)   | 7.70<br>(5.72~10.08)   |

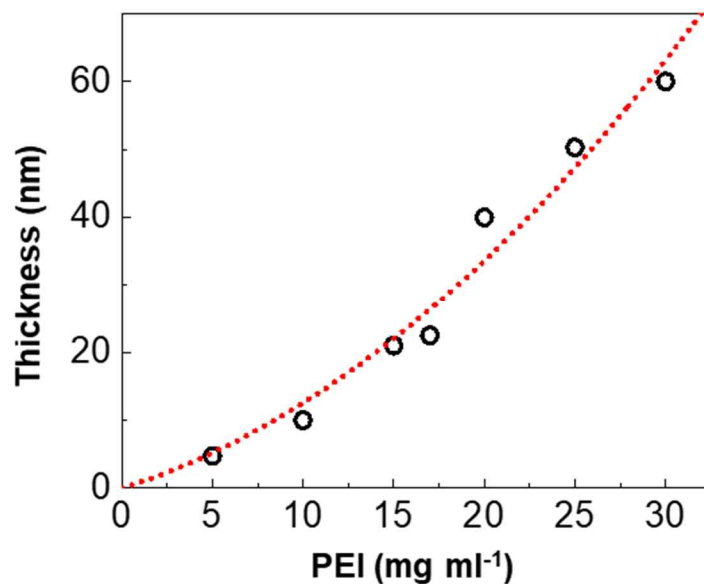

**Figure S1.** The thickness of bPEI films as a function of bPEI solution concentration. The bPEI films were spin-coated at 4000 rpm for 60 using bPEI solutions (30, 25 20, 17, 15, 10, and 5.0 mg ml<sup>-1</sup>). Note that the film thickness was measured using a surface profilometer. The thickness of thinner bPEI films (layers), which were prepared from dilute solutions (2.0, 1.5, 1.0, 0.7, 0.5, 0.2 and 0.1 mg ml<sup>-1</sup>), was estimated on the basis of the prediction curve (red line).

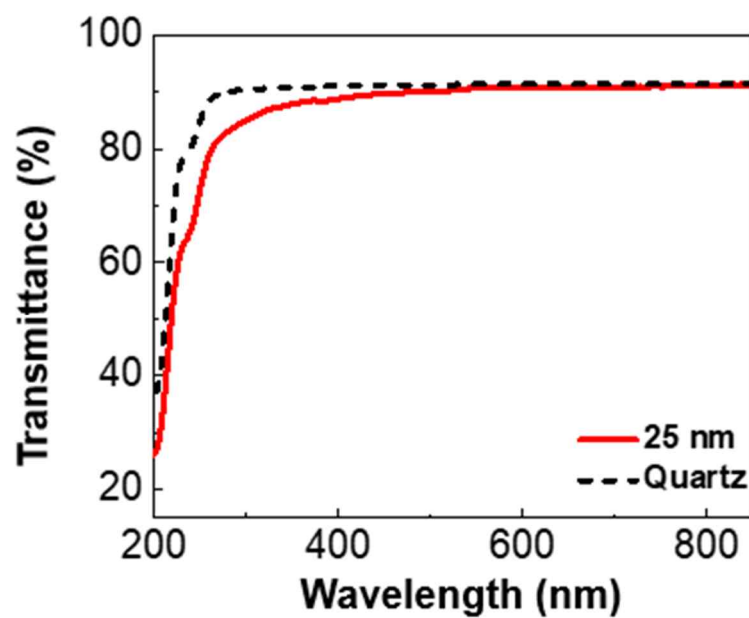

**Figure S2.** Optical transmittance spectrum of the 25 nm-thick bPEI films coated on a quartz substrate: (see the black dashed line for the quartz substrate only).

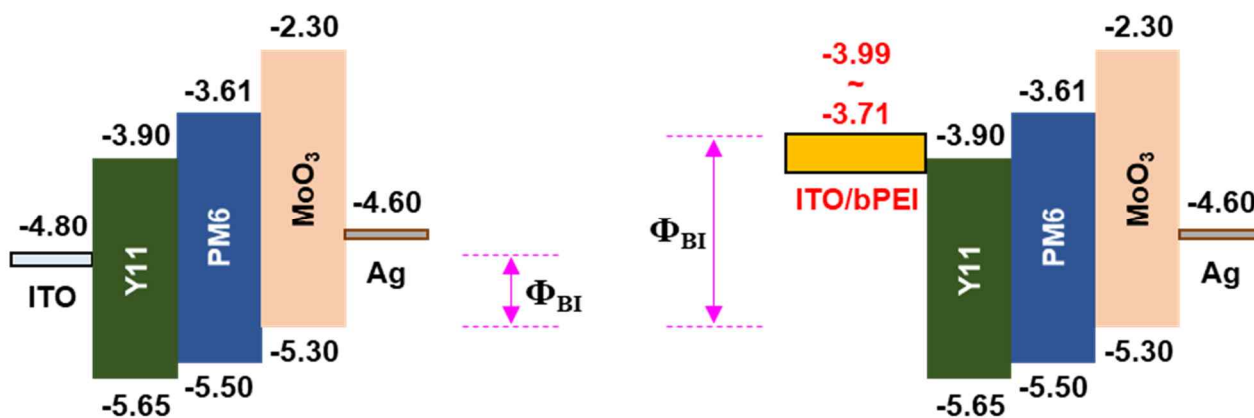

**Figure S3.** Comparison of flat energy band diagrams for the PSCs with (right) or without (left) the bPEI interfacial layers. Note that the built-in electric field ( $\Phi_{BI}$ ) was approximated from the energy levels: (left) between the work function of ITO and the HOMO energy level of MoO<sub>3</sub>; (right) between the work function of bPEI-coated ITO (ITO/bPEI) and the HOMO energy level of MoO<sub>3</sub>.

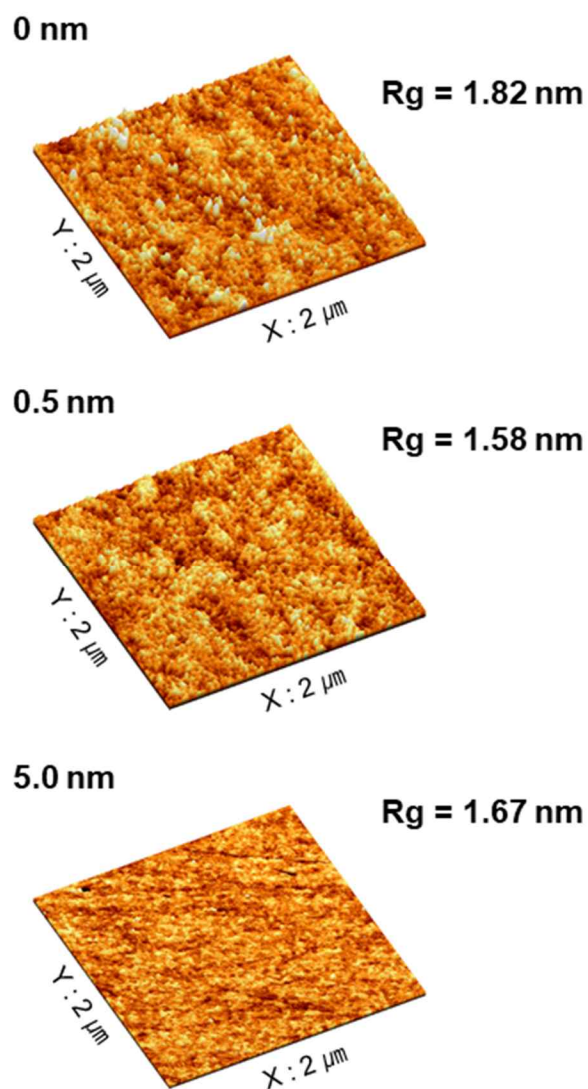

**Figure S4.** Height-mode AFM images (2  $\mu\text{m}$  x 2  $\mu\text{m}$ ) for the bPEI-coated ITO surfaces according to the thickness of bPEI layers. Note that  $R_g$  denotes the root-mean-square (rms) roughness values.

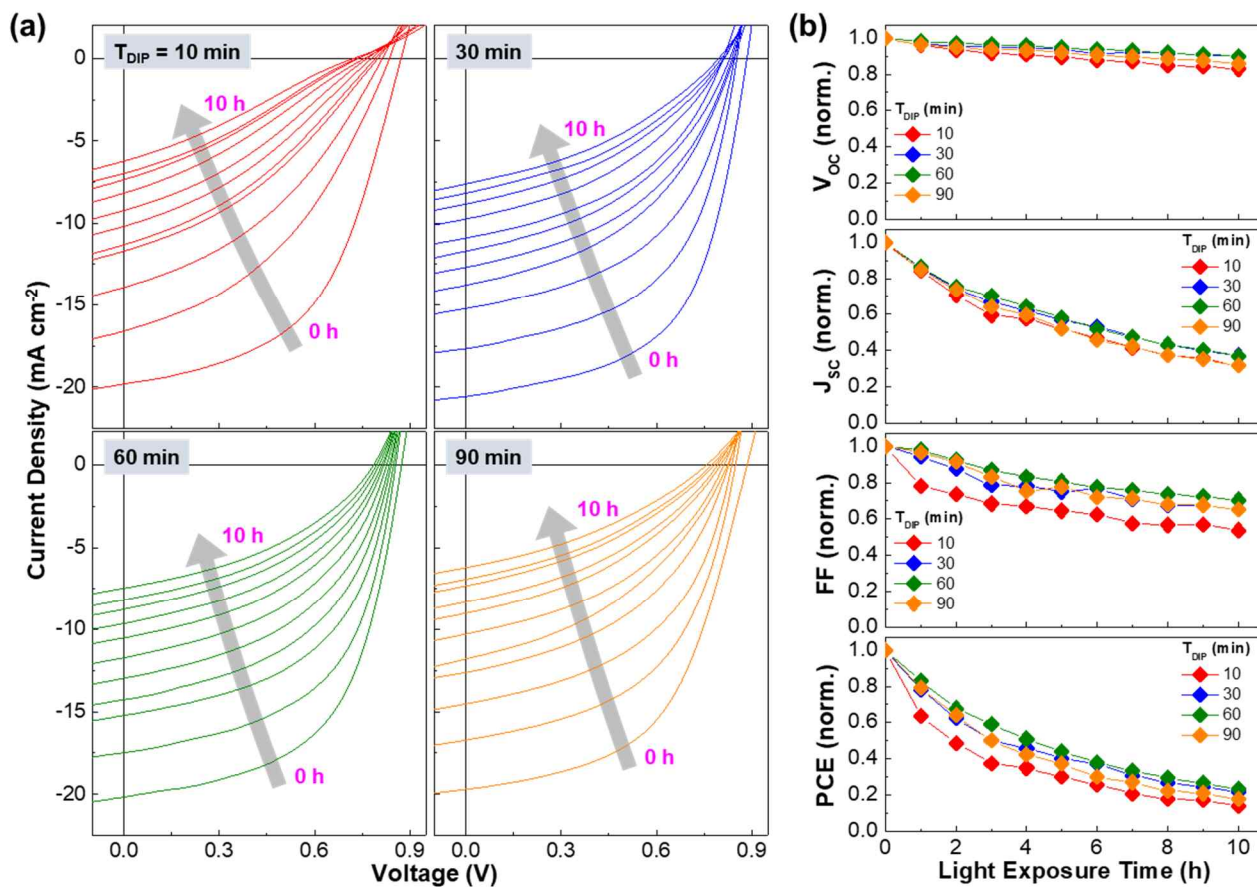

**Figure S5.** Stability of the PM6:Y11 solar cells with the water-dipped bPEI interlayers ( $T_{\text{DIP}} = 0, 30, 60, 90$  min) under 1 sun condition for 10 h according to the dipping time: (a) J-V curves, (b) relative (normalized, initial state = 1.0) parameter values as a function of light exposure time.



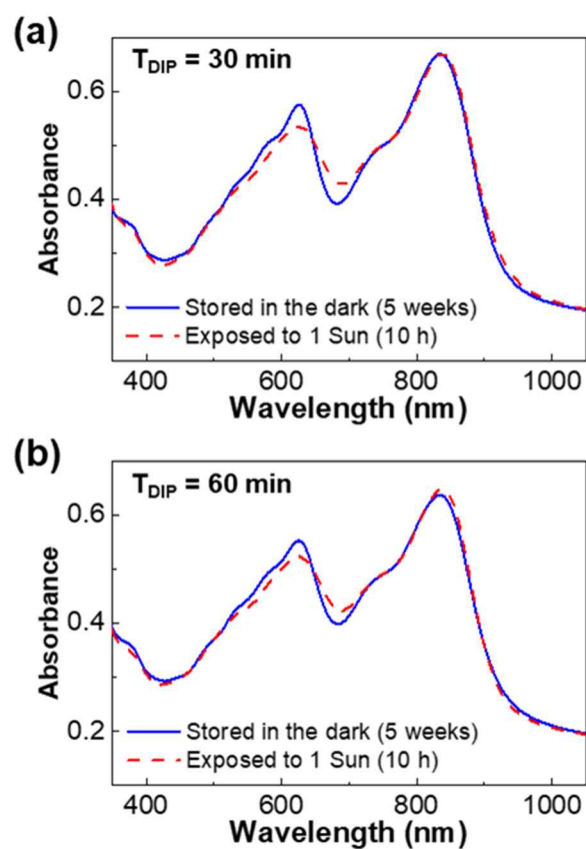

**Figure S6.** Optical absorption spectra (original data, unnormalized) of the PM6:Y11 films (glass/ITO/bPEI/PM6:Y11) that were stored for 5 weeks in the dark (blue solid lines) and exposed to the 1 sun condition for 10 h (red dashed lines): (a)  $T_{DIP} = 30 \text{ min}$ , (b)  $T_{DIP} = 60 \text{ min}$ .

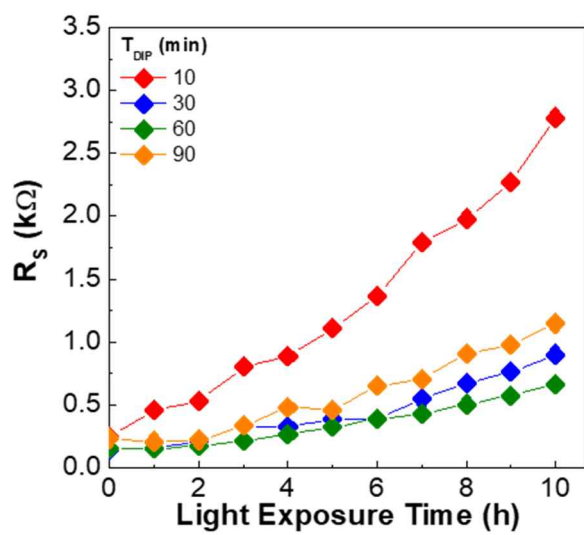

**Figure S7.** Change of series resistance ( $R_s$ ) as a function of light exposure time for the PM6:Y11 solar cells with the water-etched bPEI interlayers ( $T_{DIP}$  = 10, 30, 60, 90 min).

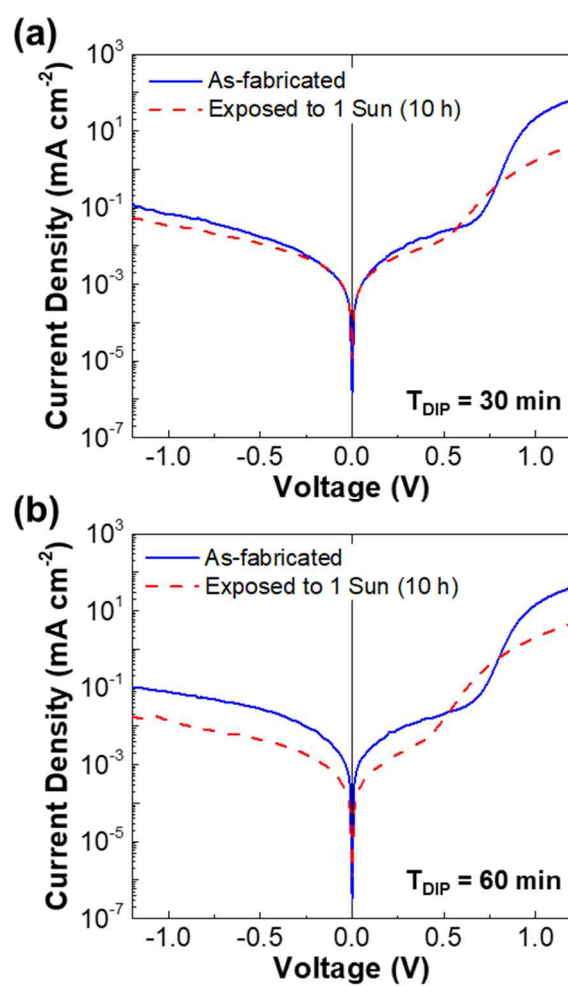

**Figure S8.** Dark J-V curves (semi-logarithmic scale) before and after exposure to 1 sun condition (10 h) for the PM6:Y11 solar cells with the water-etched bPEI interlayers: (a) dipping time ( $T_{\text{DIP}} = 30$  min), (b)  $T_{\text{DIP}} = 60$  min.
